# Supplementary material for: Measurement report: New insights into the mixing structures of black carbon on the eastern Tibetan Plateau: soot redistribution and fractal dimension enhancement by liquid‒liquid phase separation
Source: Copernicus journal article supplement (doi:10.5194/acp-2022-831), 2023-02-01
Supplement: Supplementary file [file acp-2022-831-AC1-supplement.pdf]

## Response to referee #1

We are grateful for referee #1's comments. Those comments are all valuable and helpful for improving our paper and English writing. We answered the comments carefully and have made corrections in the submitted manuscript. The corrections and the responses are as following:

In the revised manuscript, the red color was marked as the revised places.

### General comments

*This manuscript by Yuan et al. reports detailed mixing states and shapes of soot particles mixed with organic matter and sulfate collected at the eastern Tibetan Plateau. They discussed liquid-liquid phase separation and redistribution of soot particles within particles. Mixing states and shapes of soot particles influence the optical properties of internally mixed particles and their radiation. Thus the results are important to the understanding of climate influence. My major concern is that it is probable that the mixing states and shapes that they measured could be influenced by both atmospheric processes and impaction on the substrates when collected. Therefore, I suggest more careful discussion of the influence of the changes on the filter should be provided. I also recommend having some discussion based on chemical and physical processes about liquid-liquid phase separation and soot redistribution.*

### Major comments

*Comment #1: The TEM images show mixing states after the particle collection on the substrates. Thus, changes in shapes and mixing states should be carefully discussed if they had changed in the air or on the substrate. Discussing the two-dimensional mixing states of particles on the substrate is acceptable. However, when discussing their mixing states in the atmosphere, the coating materials should cover the entire surface. When discussing the implication for the climate, the discussion should*

30 *depend on their three-dimensional shape in the atmosphere. At least, the TEM images*  
*show that organic coatings cover the perimeter of the spread sulfate, which cannot be*  
*a realistic 3D shape in the atmosphere. The coating thickness in the TEM image may*  
*be different from that in the atmosphere as they spread over the substrate. Sulfates are*  
*also shrinking by losing water on the substrate and have some space with organic*  
35 *coatings (Fig. 3b). There are also some traces around the particles (Fig. 3b). As a*  
*result, the shapes and mixing states could have been different from their original or*  
*partially the same as the These points need to be clearly discussed in the paper.*

**Reply:** We appreciate the reviewer's comments.

TEM is one of the best technique to determine real mixing state of single  
40 particles and has been widely used in large amounts of laboratory studies and field  
observations (Li et al., 2016). The 3D morphology of the aerosol particles in this  
study was investigated by using an atomic force microscope (AFM). We provide a  
typical AFM image of an OM-coating particle in Figure S2. As shown in Fig. S2a,  
there is a linear relationship between the ECD and EVD of particles and the relation  
45 between  $d$  and  $D$  is  $D=0.4144 \times d$ . The sizes and coating thicknesses of individual  
particles are calculated based on the EVD and the detailed calculation method can be  
found in Zhang et al. (2022).

In context, line 122-124: "As shown in Fig. S2a, there is a linear relationship  
between the ECD and EVD of particles with  $D=0.4144 \times d$ . The sizes and coating  
50 thicknesses of individual particles are calculated based on the EVD and the detailed  
calculation method can be found in Zhang et al. (2022)."

Line 205-206: "Similar to the method employed by Zhang et al. (2022), we  
calculated the OM-coating thicknesses and the entire particle sizes based on TEM and  
AFM (Fig. 5)."

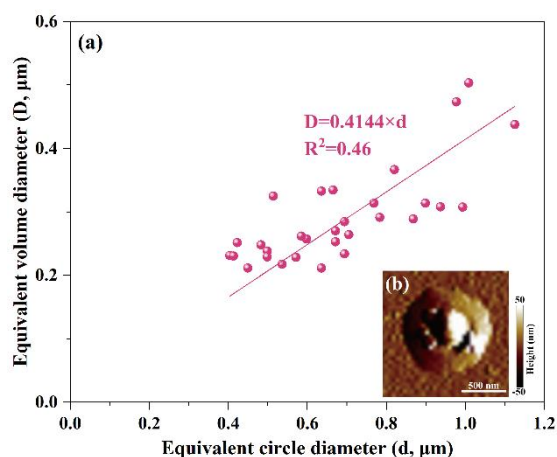

55

“Figure S2. (a) The correlation of equivalent circle diameter (ECD, d) and the equivalent volume diameter (EVD, D) obtained by AFM. (b) An AFM image of an OM-coating particle.”

60 *Comment #2: Although liquid-liquid phase separation and soot redistribution is interesting results, I suggest having more discussion based on chemical and physical processes. Why do they have such a process? What are the physical and chemical processes (e.g., the hygroscopicity of soot, surface tension, viscosity, etc.)? When did these processes occur? Some more discussion in Fig. 9 will be helpful in interpreting the results.*

65 **Reply:** We appreciate the reviewer’s comments. We conducted a solid reference survey and added the detailed explanation of liquid-liquid phase separation and soot redistribution phenomenon.

In context, line 165-171: “Optical and fluorescence microscopy analyses revealed that the LLPS could occur in individual ambient aerosols, with the presence of two separate phases: inner ammonium sulfate and outer secondary organic material (You et al., 2012). Cryo-TEM measurements further confirmed that the LLPS formed the distinct core-shell structures with sulfate core and OM-coating in ambient aerosols (Altaf et al., 2016; Li et al., 2021). Furthermore, the LLPS particles have been widely observed in Arctic air (Kirpes et al., 2022; Yu et al., 2019), rural and mountain areas (Zhang et al., 2022), and forest air (Li et al., 2020). Therefore, we concluded that S-soot-OM-coating particles as shown in Figure 2 can be considered as soot particles mixed with the LLPS particles.”

75

In context, line 174-181: “It is well known that soot particles typically contains hydrocarbons, polycyclic aromatic hydrocarbons, and partially oxidized organics generated during combustion (Long et al., 2013;Wang, 2011). Moreover, TEM observations revealed a thin amorphous organic coating on carbon nanospheres of fresh soot particles (Buseck et al., 2014). The combustion processes always produce extremely thin organic layers on each soot monomer (Leskinen et al., 2023;Chen et al., 2016). Freedman (2017) showed that the LLPS process can influence surface and interfacial tensions among different phases in individual particles. Therefore, some studies used the intermolecular forces and interactions between similar chemical bonds to explain the phenomenon of soot redistribution in individual particles (Brunamonti et al., 2015;Zhang et al., 2022).”

90 **Specific comments**

*Comment #1: Line 52 “This uncertainty in BC radiative forcing is largely” Are you discussing an uncertainty or “a large difference in several model studies” here? Is this uncertainty caused by only “the lensing effects of the coating”? I assume that different emission inventories are also the cause of large uncertainty.*

95 **Reply:** We appreciate the reviewer’s comments. We revised this sentence as follow:

In context, line 53-54: “This differences and uncertainties in BC radiative forcing are largely caused by the variability of the actual BC-mixing state in most models and in the ambient air (Hu et al., 2021;Zhai et al., 2022;Fierce et al., 2020;Riemer et al., 2019;Adachi and Buseck, 2013).”

100

*Comment #2: Line 121 “The equivalent circle diameter (ECD,  $d$ ) and the equivalent volume diameter (EVD,  $D$ ) were calculated according to the bearing area and bearing volume.” Is soot particle included in the plot? If so, EVD cannot be related to ECD because of its fractal shape.*

105 **Reply:** We appreciate the reviewer’s comments. Soot particles were not included in the plot. We provide a typical AFM image of an OM-coating particle in Figure S2.

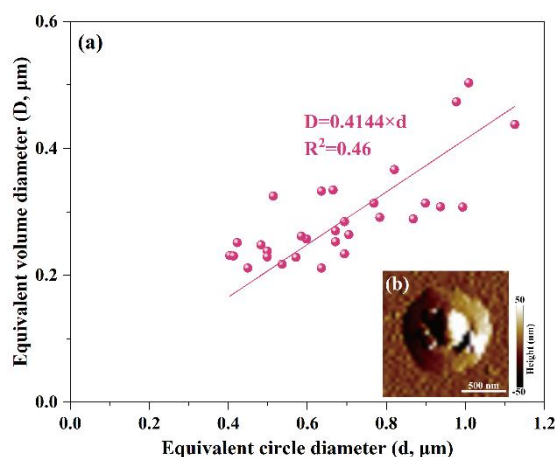

“Figure S2. (a) The correlation of equivalent circle diameter (ECD, d) and the equivalent volume diameter (EVD, D) obtained by AFM. (b) An AFM image of an OM-coating particle.”

110

*Comment #3: Line 151 “S4b). The sulfate core and OM-coating in secondary particles were identified as LLPS” Why? Please explain this reason.*

**Reply:** We appreciate the reviewer’s comments. We added the result of EDS spectrum and provided some references to confirm the LLPS particles as follow:

115

In context, line 158-164: “Finally, the third type of soot-containing particle is core-shell particles with soot in either the core or the coating (Fig. 2e, 2g). The EDS spectrum shows that the coating is most likely to be organic matter (OM) with significantly higher carbon and lower sulfur content compared to the core (Fig. 2f, 2h). This similar core-shell particles have been identified as “OM-coating structure” (Li et al., 2016), which were reported in previous field observations and laboratory studies (Adachi et al., 2022;Li et al., 2021;Freedman, 2020;Li et al., 2020;Shi et al., 2008). Consequently, we called soot internally mixed within sulfate core or OM-coating as “S-soot-OM-coating” (Fig. 2e, 2g).”

120

125

In context, line 165-171: “Optical and fluorescence microscopy analyses revealed that the LLPS could occur in individual ambient aerosols, with the presence of two separate phases: inner ammonium sulfate and outer secondary organic material (You et al., 2012). Cryo-TEM measurements further confirmed that the LLPS formed the distinct core-shell structures with sulfate core and OM-coating in ambient aerosols (Altaf et al., 2016;Li et al., 2021). Furthermore, the LLPS particles have been widely

130 observed in Arctic air (Kirpes et al., 2022; Yu et al., 2019), rural and mountain areas  
(Zhang et al., 2022), and forest air (Li et al., 2020). Therefore, we concluded that  
S-soot-OM-coating particles as shown in Figure 2 can be considered as soot particles  
mixed with the LLPS particles.”

135 *Comment #4: Line 157 “A laboratory study and field observations have shown that  
LLPS can drive soot in core-shell particles from inside inorganic aerosols to outer  
organic aerosols, which is called the soot redistribution phenomenon” Why does it  
happen? Please explain this soot redistribution phenomenon in more detail.*

**Reply:** We appreciate the reviewer’s comments. We provided the detailed explanation  
140 of soot redistribution phenomenon as follow:

In context, line 174-181: “It is well known that soot particles typically contains  
hydrocarbons, polycyclic aromatic hydrocarbons, and partially oxidized organics  
generated during combustion (Long et al., 2013; Wang, 2011). Moreover, TEM  
observations revealed a thin amorphous organic coating on carbon nanospheres of  
145 fresh soot particles (Buseck et al., 2014). The combustion processes always produce  
extremely thin organic layers on each soot monomer (Leskinen et al., 2023; Chen et al.,  
2016). Freedman (2017) showed that the LLPS process can influence surface and  
interfacial tensions among different phases in individual particles. Therefore, some  
studies used the intermolecular forces and interactions between similar chemical  
150 bonds to explain the phenomenon of soot redistribution in individual particles  
(Brunamonti et al., 2015; Zhang et al., 2022).”

*Comment #5: Line 182 “Therefore, we can conclude that soot redistribution in  
secondary particles is a common phenomenon on Mt. Emei.” The results were  
155 obtained only from limited samples and periods. Therefore, it is difficult to have a  
general conclusion.*

**Reply:** We appreciate the reviewer’s comments. We revised this sentence as follow:

In context, line 204: “Therefore, we conclude that soot redistribution in secondary particles is a common occurrence on Mt. Emei during the sampling period.”

160

*Comment #6: Line 188 “Figure 5b shows that the entire particle size and coating thickness exhibited good correlations, suggesting that larger particles along with thicker OM-coatings can drive soot particles into the organics from the sulfate core due to LLPS.” I do not think the correlation suggests the latter sentence. There is a large gap between observation and the discussion.*

165

**Reply:** We appreciate the reviewer’s comments and we revised the content as follow:

In context, line 206-208: “Figure 5b shows that there is a certain positive correlation between the OM-coating thicknesses and the entire particle sizes, implying that larger S-soot-OM-coating particles tend to contain thicker OM-coating.”

170

*Comment #7: Line 202 “The results suggest that the coarser particles following the thicker Omcoatings captured more soot particles in the OM-coating during the redistribution process” Why can it be concluded that it happened “during the redistribution process”? Can they simply be coagulated in the atmosphere, not “during the redistribution process”?*

175

**Reply:** We appreciate the reviewer’s comments and we revised the content as follow:

In context, 238-239: “These results suggested that there was a higher tendency for multiple soot particles to distribute in the larger LLPS particles (Fig. 7c-e).”

180

*Comment #8: Line 204 “direct in situ evidence” I do not think it is direct and in situ evidence. They are obtained from the observation of filter samples.*

**Reply:** We appreciate the reviewer’s comments and we revised the content as follow:

In context, line 240: “All of these observations provided evidence for soot redistribution in LLPS particles in the atmosphere over the eastern TP.”

185

*Comment #9: Line 205 “soot size” Is soot size provided? Fig. 4a shows that soot has a narrow size distribution. Which data should I see?*

**Reply:** We appreciate the reviewer’s comments. The original statement was deemed controversial and thus has been revised based on previous studies to provide clarity. The revised content is as follows:

In context, line 242: “The soot redistribution is probably governed by the entire particle size and the ratio of OM-coating thickness to soot size.”

*Comment #10: Line 210 “The average  $D_f$  of externally mixed soot on Mt. Emei was  $1.79\pm 0.09$  (Table 1), which was slightly higher than that on the southeastern TP ( $1.75\pm 0.08$ ) (Yuan et al., 2019), suggesting that the sources of soot particles in the eastern TP atmosphere were more complex” First, I do not understand the interpretation of “more complex.” Second, values  $1.79\pm 0.09$  and  $1.75\pm 0.08$  essentially have no difference.*

**Reply:** We appreciate the reviewer’s comments. We have deleted this sentence.

*Comment #11: Line 216 “The sulfate-coated soot and organic-coated soot particles had a higher CV (0.87 and 0.87, respectively), higher RN (0.41 and 0.42, respectively) and lower AR (1.61 and 1.61, respectively) than those of externally mixed soot (avg. CV=0.81, avg. RN=0.38, and avg. AR=1.63).” Interestingly, the sulfate-coated and organic-coated soot particles had nearly the same morphological parameters. Are they contradict the discussion of their fractal dimension in line 220? I do not see “a significant increase in fractal dimension” (line 220) when considering their error range and the plot in Fig 8a. The difference can be within an uncertainty range.*

**Reply:** We appreciate the reviewer’s comments. The differences of  $D_f$  between sulfate-coated BC and organic-coated BC were really small. We have deleted this sentence and rewrote the content as follow:

In context, line 252-254: “The conclusion derived from all these morphological parameters was consistent with the compacted soot particles enclosed by sulfate and



organics. Indeed, several field and laboratory studies found that soot embedded with sulfate and organics could increase its compactness after coating (Wang et al., 2021; Xue et al., 2009; Saathoff et al., 2003).”

220 *Comment #12: Figure 7a. Please add a unit for the x-axis (nm).*

**Reply:** We appreciate the reviewer’s comments. We modified the Figure 7.

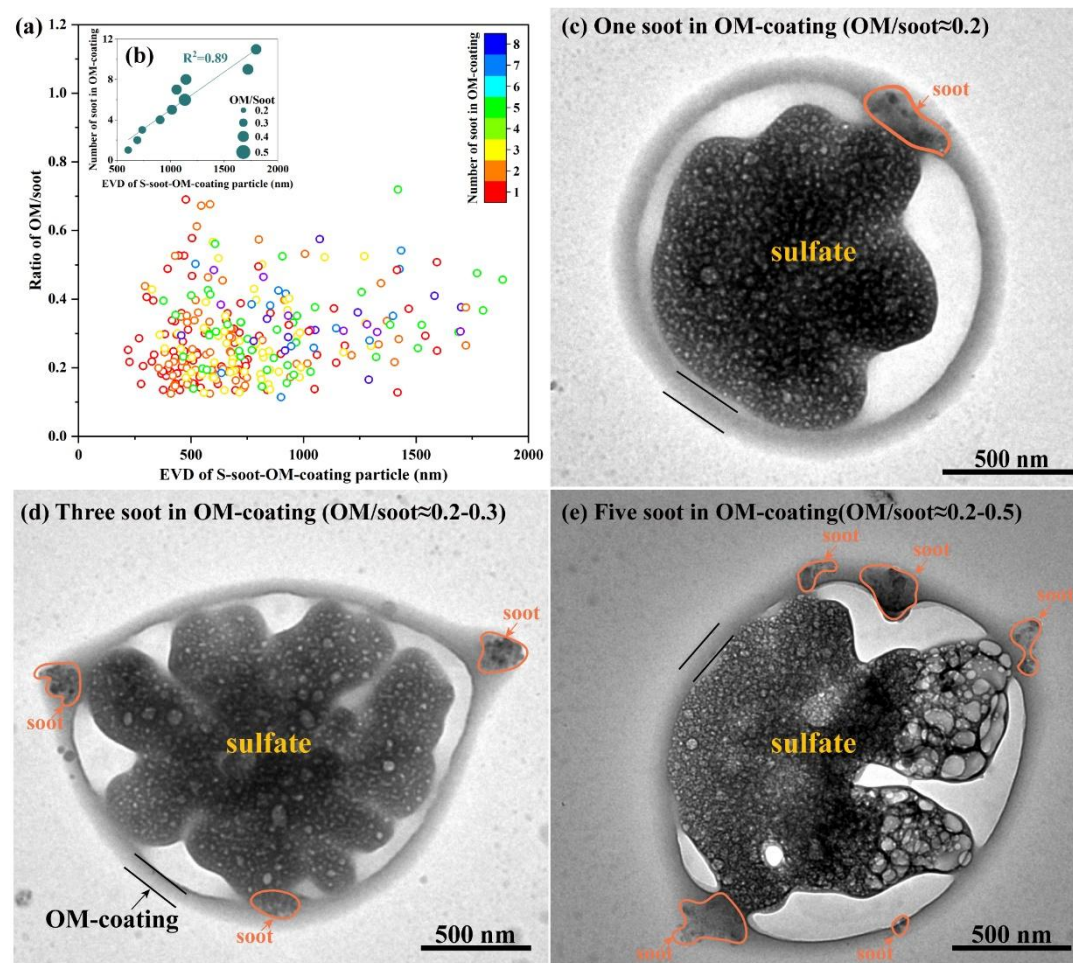

225 Figure 7. (a) Scatter diagram of OM/soot and the entire particle size of the S-soot-OM-coating particles. Different colours represent the number of soot particles being captured in the OM-coating. (b) Correlation between the average size of the S-soot-OM-coating particle and the average number of soot particles in the OM-coating. The size of the circle point represents the average ratio of OM/soot. (c) A typical TEM image of a S-soot-OM-coating particle with one soot particle in an OM-coating (OM/soot ≈ 0.2, the size of S-soot-OM-coating ≈ 336 nm). (d) A typical TEM image of a S-soot-OM-coating particle with three soot particles in an OM-coating (OM/soot ≈ 0.2-0.3, the size of S-soot-OM-coating ≈ 652 nm). (e) A typical TEM image of a S-soot-OM-coating particle with five soot particles in an OM-coating (OM/soot ≈ 0.2-0.5, the size of S-soot-OM-coating ≈ 582 nm).

230

Comment #13: Figure 9. I suggest having more discussion in Fig. 9. What do (>90%) and (>70%) mean? At high RH, I guess sulfates deliquesced and had a much larger size. I suggest adding how the liquid-liquid separation and soot redistribution occur in this figure.

235

**Reply:** We appreciate the reviewer’s comments. We modified Fig. 9 and added some discussion as follow:

In context, line 263: “54% of the total particles were soot-containing particles (Figs. S3 and 9).”

240

In context, line 271-274: “Once the OM/soot ratio exceeded 0.2, more than 80% of the soot tended to distribute in the organic coating because of the possible intermolecular forces and interactions with increasing coating thickness (Figs. 6b, 9). Conversely, when the OM/soot ratio was less than 0.1, all of the soot in the S-soot-OM-coating particles was found in the sulfate core (Figs. 6b, 9).”

245

In context, line 275-277: “Theoretical calculations have shown that aged soot particles that were internally mixed with sulfate and organics had higher  $D_f$  values ( $1.84 \pm 0.07$  for sulfate-coated soot,  $1.95 \pm 0.06$  for organic-coated soot) than those of externally mixed soot ( $1.79 \pm 0.09$ ).”

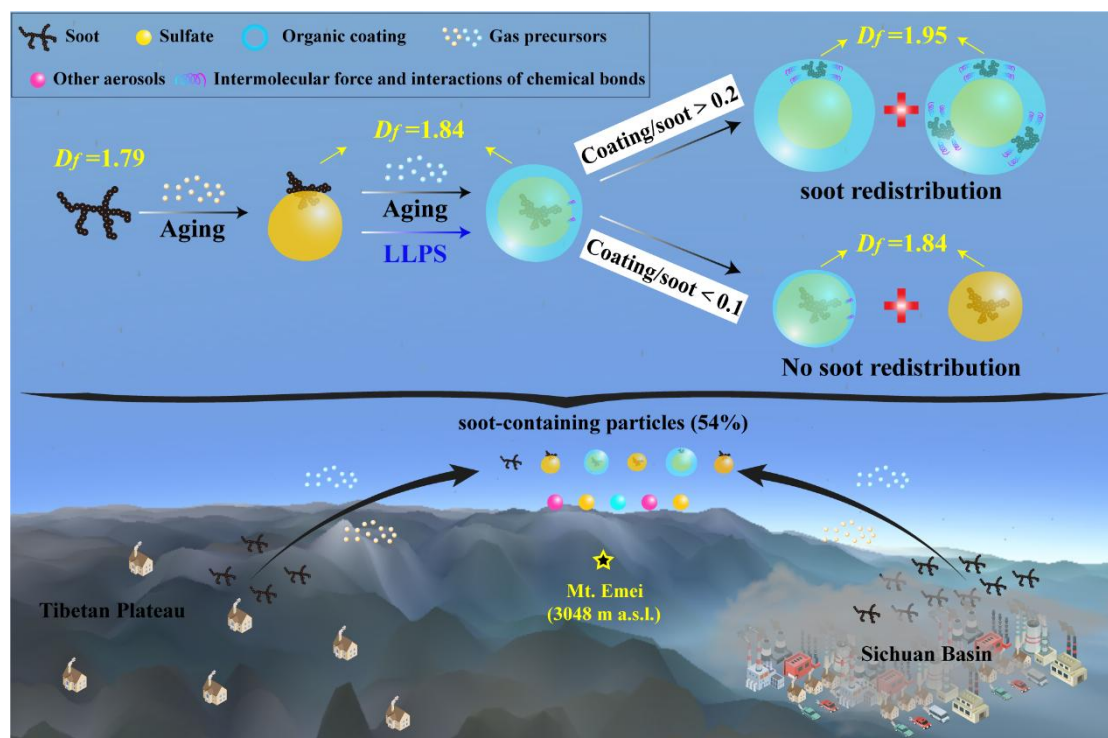

250 **Figure 9. A conceptual model illustrating the atmospheric processes of BC on the eastern rim of the Tibetan Plateau.**

### Reference:

- Adachi, K., and Buseck, P. R.: Changes of ns-soot mixing states and shapes in an urban area during CalNex, *Journal of Geophysical Research-Atmospheres*, 118, 3723-3730, 2013.
- 255 Adachi, K., Tobo, Y., Koike, M., Freitas, G., Zieger, P., and Krejci, R.: Composition and mixing state of Arctic aerosol and cloud residual particles from long-term single-particle observations at Zeppelin Observatory, Svalbard, *Atmospheric Chemistry and Physics*, 22, 14421-14439, 2022.
- Altaf, M. B., Zuend, A., and Freedman, M. A.: Role of nucleation mechanism on the size dependent morphology of organic aerosol, *Chemical Communications*, 52, 9220-9223, 2016.
- 260 Brunamonti, S., Krieger, U. K., Marcolli, C., and Peter, T.: Redistribution of black carbon in aerosol particles undergoing liquid-liquid phase separation, *Geophysical Research Letters*, 42, 2532-2539, 2015.
- Buseck, P. R., Adachi, K., Andras, G., Tompa, E., and Mihaly, P.: Ns-Soot: A Material-Based Term for Strongly Light-Absorbing Carbonaceous Particles, *Aerosol Science and Technology*, 48, 777-788, 2014.
- 265 Chen, C., Fan, X. L., Shaltout, T., Qiu, C., Ma, Y., Goldman, A., and Khalizov, A. F.: An unexpected restructuring of combustion soot aggregates by subnanometer coatings of polycyclic aromatic hydrocarbons, *Geophysical Research Letters*, 43, 11080-11088, 2016.
- Fierce, L., Onasch, T. B., Cappa, C. D., Mazzoleni, C., China, S., Bhandari, J., Davidovits, P., 270 Fischer, D. A., Helgestad, T., Lambe, A. T., Sedlacek, A. J., Smith, G. D., and Wolff, L.: Radiative absorption enhancements by black carbon controlled by particle-to-particle heterogeneity in composition, *Proceedings of the National Academy of Sciences*, 117, 5196-5203, 2020.
- Freedman, M. A.: Phase separation in organic aerosol, *Chemical Society Reviews*, 46, 7694-7705, 2017.
- 275 Freedman, M. A.: Liquid-Liquid Phase Separation in Supermicrometer and Submicrometer Aerosol Particles, *Accounts of Chemical Research*, 53, 1102-1110, 2020.
- Hu, K., Liu, D., Tian, P., Wu, Y., Deng, Z., Wu, Y., Zhao, D., Li, R., Sheng, J., Huang, M., Ding, D., Li, W., Wang, Y., and Wu, Y.: Measurements of the Diversity of Shape and Mixing State for Ambient Black Carbon Particles, *Geophysical Research Letters*, 48, e2021GL094522, 2021.
- 280 Kirpes, R. M., Lei, Z., Fraund, M., Gunsch, M. J., May, N. W., Barrett, T. E., Moffett, C. E., Schauer, A. J., Alexander, B., Upchurch, L. M., China, S., Quinn, P. K., Moffet, R. C., Laskin, A., Sheesley, R. J., Pratt, K. A., and Ault, A. P.: Solid organic-coated ammonium sulfate particles at high relative humidity in the summertime Arctic atmosphere, *Proceedings of the National Academy of Sciences*, 119, e2104496119, 2022.
- 285 Leskinen, J., Hartikainen, A., Vaatainen, S., Ihalainen, M., Virkkula, A., Mesceriakovas, A., Tiitta, P., Miettinen, M., Lamberg, H., Czech, H., Yli-Pirila, P., Tissari, J., Jakobi, G., Zimmermann, R., and Sippula, O.: Photochemical Aging Induces Changes in the Effective Densities, Morphologies, and Optical Properties of Combustion Aerosol Particles, *Environmental Science & Technology*, 57, 5137-5148, 2023.
- 290 Li, W., Sun, J., Xu, L., Shi, Z., Riemer, N., Sun, Y., Fu, P., Zhang, J., Lin, Y., Wang, X., Shao, L., Chen, J., Zhang, X., Wang, Z., and Wang, W.: A conceptual framework for mixing structures in individual aerosol particles, *Journal of Geophysical Research-Atmospheres*, 121, 13784-13798,

- 2016.
- 295 Li, W., Liu, L., Xu, L., Zhang, J., Yuan, Q., Ding, X., Hu, W., Fu, P., and Zhang, D.: Overview of primary biological aerosol particles from a Chinese boreal forest: Insight into morphology, size, and mixing state at microscopic scale, *Science of the Total Environment*, 719, 137520, 2020.
- Li, W., Liu, L., Zhang, J., Xu, L., Wang, Y., Sun, Y., and Shi, Z.: Microscopic Evidence for Phase Separation of Organic Species and Inorganic Salts in Fine Ambient Aerosol Particles, *Environmental Science & Technology*, 55, 2234-2242, 2021.
- 300 Long, C. M., Nascarella, M. A., and Valberg, P. A.: Carbon black vs. black carbon and other airborne materials containing elemental carbon: Physical and chemical distinctions, *Environmental Pollution*, 181, 271-286, 2013.
- Riemer, N., Ault, A. P., West, M., Craig, R. L., and Curtis, J. H.: Aerosol Mixing State: Measurements, Modeling, and Impacts, *Reviews of Geophysics*, 57, 187-249, 2019.
- 305 Saathoff, H., Naumann, K. H., Schnaiter, M., Schock, W., Mohler, O., Schurath, U., Weingartner, E., Gysel, M., and Baltensperger, U.: Coating of soot and (NH<sub>4</sub>)<sub>2</sub>SO<sub>4</sub> particles by ozonolysis products of alpha-pinene, *Journal of Aerosol Science*, 34, 1297-1321, 2003.
- Shi, Z. B., Zhang, D. Z., Ji, H. Z., Hasegawa, S., and Hayashi, M.: Modification of soot by volatile species in an urban atmosphere, *Science of the Total Environment*, 389, 195-201, 2008.
- 310 Wang, H.: Formation of nascent soot and other condensed-phase materials in flames, *Proceedings of the Combustion Institute*, 33, 41-67, 2011.
- Wang, Y., Li, W., Huang, J., Liu, L., Pang, Y., He, C., Liu, F., Liu, D., Bi, L., Zhang, X., and Shi, Z.: Nonlinear Enhancement of Radiative Absorption by Black Carbon in Response to Particle Mixing Structure, *Geophysical Research Letters*, 48, e2021GL096437, 2021.
- 315 Xue, H. X., Khalizov, A. F., Wang, L., Zheng, J., and Zhang, R. Y.: Effects of coating of dicarboxylic acids on the mass-mobility relationship of soot particles, *Environmental Science & Technology*, 43, 2787-2792, 2009.
- You, Y., Renbaum-Wolff, L., Carreras-Sospedra, M., Hanna, S. J., Hiranuma, N., Kamal, S., Smith, M. L., Zhang, X., Weber, R. J., Shilling, J. E., Dabdub, D., Martin, S. T., and Bertram, A. K.:
- 320 Images reveal that atmospheric particles can undergo liquid-liquid phase separations, *Proceedings of the National Academy of Sciences*, 109, 13188-13193, 2012.
- Yu, H., Li, W., Zhang, Y., Tunved, P., Dall'Osto, M., Shen, X., Sun, J., Zhang, X., Zhang, J., and Shi, Z.: Organic coating on sulfate and soot particles during late summer in the Svalbard Archipelago, *Atmospheric Chemistry and Physics*, 19, 10433-10446, 2019.
- 325 Zhai, J., Yang, X., Li, L., Bai, B., Liu, P., Huang, Y., Fu, T.-M., Zhu, L., Zeng, Z., Tao, S., Lu, X., Ye, X., Wang, X., Wang, L., and Chen, J.: Absorption Enhancement of Black Carbon Aerosols Constrained by Mixing-State Heterogeneity, *Environmental Science & Technology*, 56, 1586-1593, 2022.
- 330 Zhang, J., Wang, Y., Teng, X., Liu, L., Xu, Y., Ren, L., Shi, Z., Zhang, Y., Jiang, J., Liu, D., Hu, M., Shao, L., Chen, J., Martin, S. T., Zhang, X., and Li, W.: Liquid-liquid phase separation reduces radiative absorption by aged black carbon aerosols, *Communications Earth & Environment*, 3, 128, 2022.
